# Supplementary material for: Development of a high surface area Cu electrocatalyst for effective nitrous oxide reduction reaction
Source: Royal Society of Chemistry journal article supplement (doi:10.1039/d2re00249c), 2022-09-22
Supplement: d2re00249c1.pdf [file d2re00249c1.pdf]

## Supplementary Information

### Development of High Surface Area Cu Electrocatalyst for Effective Nitrous Oxide Reduction Reaction

Siraphat Nilvichean,<sup>1</sup> Kornkamon Meesombad,<sup>2</sup> Teera Butburee,<sup>2</sup> Pongkarn Chakthranont,<sup>\*2</sup> and Rungthiwa Methaapanon<sup>\*1</sup>

<sup>1</sup> Centre of Excellence in Particle and Material Processing Technology, Department of Chemical Engineering, Chulalongkorn University, Bangkok, Thailand 10330

<sup>2</sup>National Nanotechnology Center (NANOTEC), National Science and Technology Development Agency (NSTDA), Pathum Thani, Thailand 12120

Corresponding authors: [pongkarn.cha@nanotec.or.th](mailto:pongkarn.cha@nanotec.or.th), [rungthiwa.m@chula.ac.th](mailto:rungthiwa.m@chula.ac.th)

**Table S1.** Activities of the reported N<sub>2</sub>ORR catalysts and their testing conditions

| Catalyst                          | Cell type | Electrolyte                                        | $j_{\max}$ (mA cm <sup>-2</sup> ) (E, V vs RHE) | FE* of N <sub>2</sub> at $j_{\max}$ | E <sub>onset</sub> (V vs RHE) | Tafel slope (mV dec <sup>-1</sup> ) | Ref.         |
|-----------------------------------|-----------|----------------------------------------------------|-------------------------------------------------|-------------------------------------|-------------------------------|-------------------------------------|--------------|
| High surface area Cu              | H-cell    | 0.1 M KOH                                          | 10.0 (-0.2 V)                                   | 83.3%                               | 0.27                          | 124                                 | This work    |
| Cu metal                          | H-cell    | 0.3 M K <sub>2</sub> SO <sub>4</sub>               | 8 (-0.31 V)                                     | 78%                                 | N/A                           | N/A                                 | <sup>1</sup> |
| Polycrystal Cu                    | RDE**     | 0.3 M K <sub>2</sub> SO <sub>4</sub>               | 43.75 (-0.8 V)                                  | N/A                                 | -0.56                         | N/A                                 | <sup>2</sup> |
| In/Cu foam                        | H-cell    | 0.5 M NaOH                                         | 25 (-0.75 V)                                    | ~100%                               | <0                            | N/A                                 | <sup>3</sup> |
| ZnO                               | H-cell    | 0.3 M K <sub>2</sub> SO <sub>4</sub>               | 6.8 (-0.82 V)                                   | 91%                                 | N/A                           | N/A                                 | <sup>1</sup> |
| In <sub>2</sub> O <sub>3</sub>    | H-cell    | 0.3 M K <sub>2</sub> SO <sub>4</sub>               | 8.5 (-0.47 V)                                   | 82%                                 | N/A                           | N/A                                 | <sup>1</sup> |
| SnO <sub>2</sub>                  | H-cell    | 0.3 M K <sub>2</sub> SO <sub>4</sub>               | 6.6 (-0.57 V)                                   | 73%                                 | N/A                           | N/A                                 | <sup>1</sup> |
| Polycrystal Pd                    | RDE       | 0.1 M NaOH                                         | 20 (0 V)                                        | N/A                                 | 0.64                          | 84                                  | <sup>4</sup> |
| Pd <sub>60</sub> Cu <sub>40</sub> | H-cell    | 0.3 M K <sub>2</sub> SO <sub>4</sub> and 0.2 M KOH | 6.0 (0.04 V)                                    | N/A                                 | 0.73                          | 96                                  | <sup>5</sup> |
| Au@Pd                             | RDE       | 0.2 M K <sub>2</sub> SO <sub>4</sub> and 0.3 M KOH | N/A                                             | N/A                                 | 0.84                          | 105                                 | <sup>6</sup> |
| Polycrystal Pt                    | RDE       | 0.1 M NaOH                                         | 7.4 (0.2 V)                                     | N/A                                 | 0.5                           | 111                                 | <sup>4</sup> |
| Pt on gas diffusion electrode     | Flow cell | 1 M KOH                                            | 130 (0 V)                                       | 100%                                | 0.44                          | N/A                                 | <sup>7</sup> |
| Ir (100)                          | N/A       | 0.1 M HClO <sub>4</sub>                            | Inactive                                        | N/A                                 | N/A                           | N/A                                 | <sup>8</sup> |
| Ir (111)                          | N/A       | 0.1 M HClO <sub>4</sub>                            | ~0.85 (~0.1 V)                                  | N/A                                 | ~0.3                          | N/A                                 | <sup>8</sup> |
| Ir (110)                          | N/A       | 0.1 M HClO <sub>4</sub>                            | ~0.75 (~0.1 V)                                  | N/A                                 | ~0.3                          | N/A                                 | <sup>8</sup> |

\*Faradaic efficiency (FE) of N<sub>2</sub> can be calculated only if the gas product is quantified. Most of the N<sub>2</sub>ORR studies reported in the literature have not performed any product detection for N<sub>2</sub> or H<sub>2</sub>.

\*\* Rotating disk electrode (RDE) employs rotation motion to improve the mass transport of N<sub>2</sub>O to the electrode, which leads to a higher  $j_{\max}$  than H-cell system; however, product detection is not feasible in this setup as the electrochemical cell is not gas-tight.

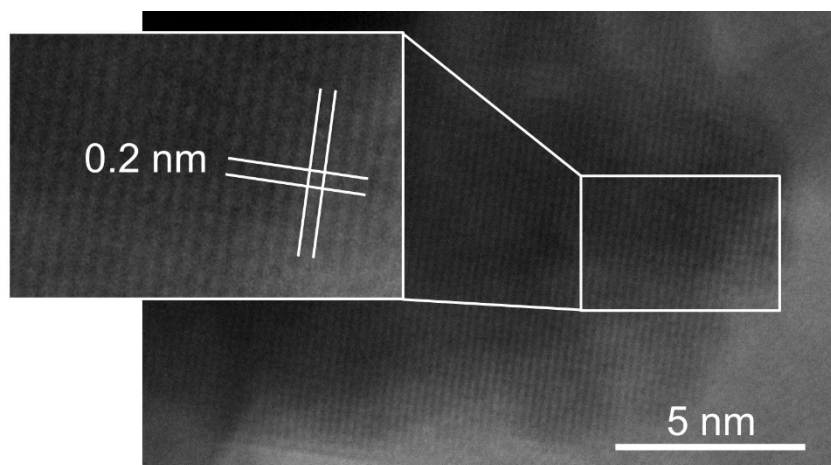

**Figure S1.** High resolution transmission electron microscopy (HRTEM) image of Cu<sub>2</sub>O electrodeposited at 40 °C for 30 minutes exhibits 0.2 nm lattice fringes associated with the (200) planes of Cu<sub>2</sub>O.

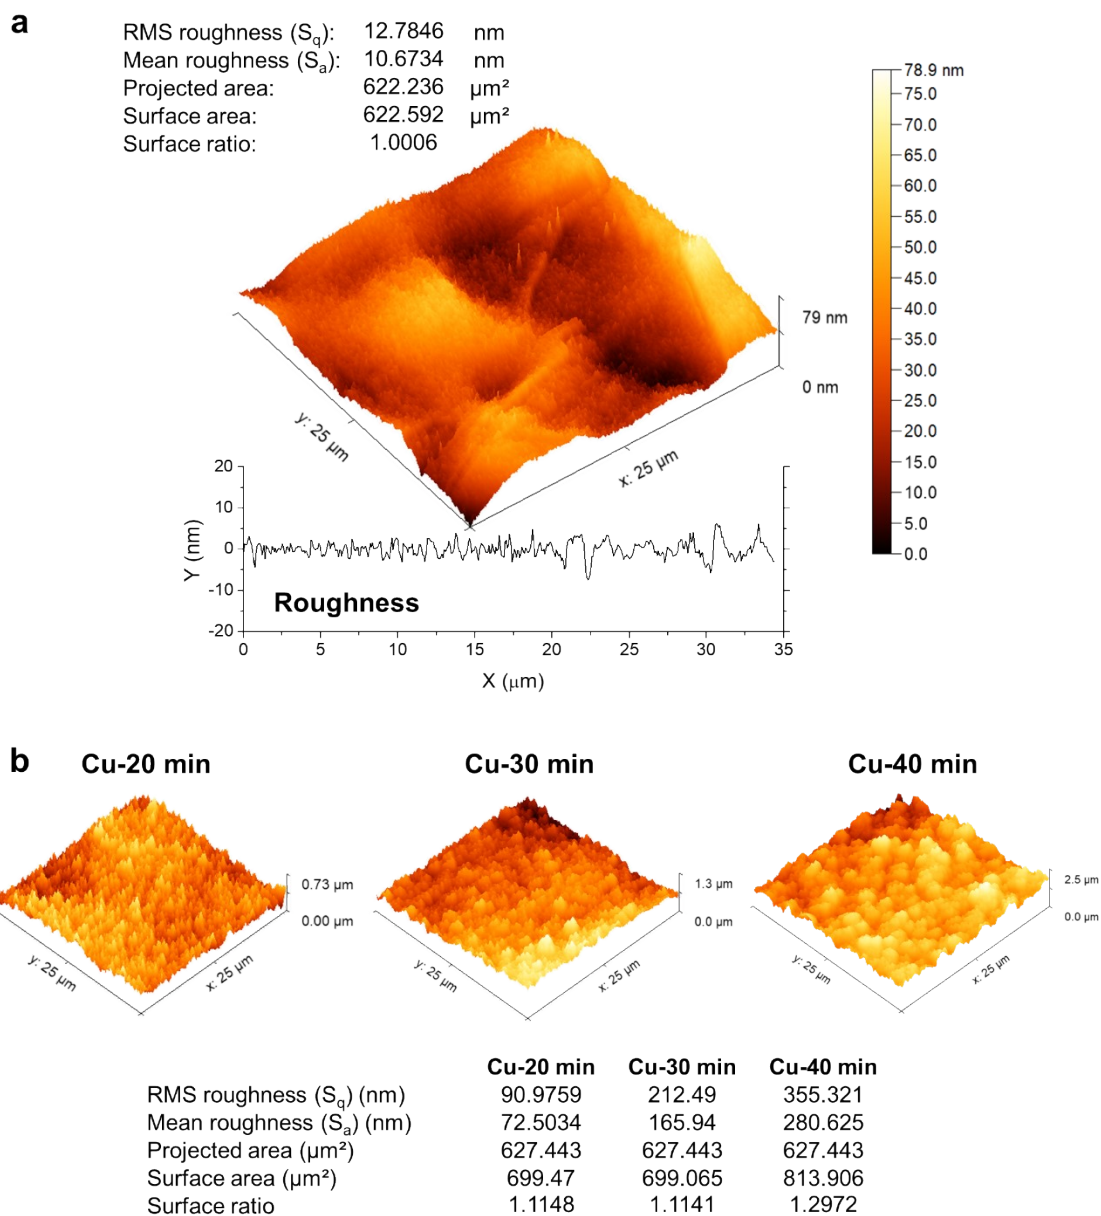

**Figure S2.** (a) AFM measurements of the roughness, surface area, and surface ratio (real surface area/projected surface area) of electropolished Cu foil confirm that the Cu-Epolish sample was significantly flat (surface ratio = 1) and can be used to calculate the true electrochemically active surface area (ECSA) of the high surface area electrodes. (b) Surface morphologies of  $\text{Cu}_2\text{O}$  electrodeposited at 40 °C for 20, 30, and 40 min as characterized by AFM. Due to the highly porous structure of electrodeposited  $\text{Cu}_2\text{O}$ , the surface area ratio from AFM would underestimate the actual surface areas of these high surface area electrodes.

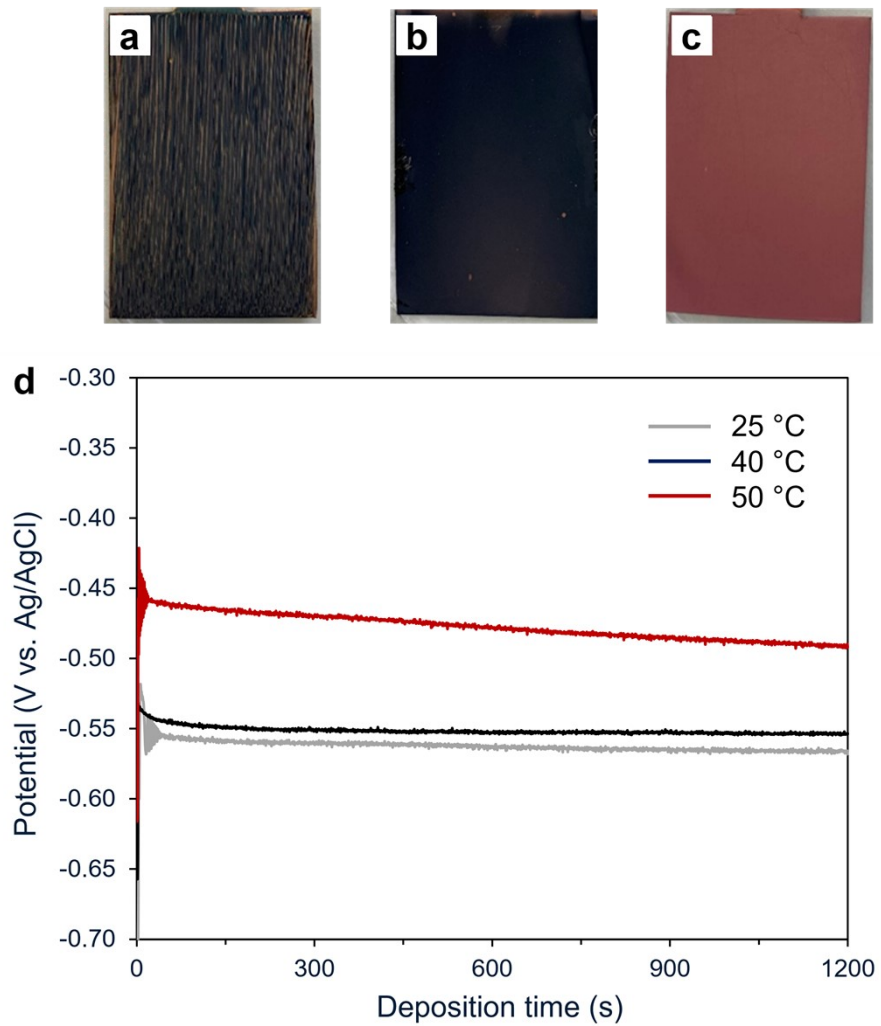

**Figure S3.** Photos of the Cu<sub>2</sub>O electrodes deposited at (a) 25 °C, (b) 40 °C, and (c) 50 °C. (d) Deposition potentials of the Cu<sub>2</sub>O electrodes conducted at a fixed current density of -1.7 mA cm<sup>-2</sup> for 20 min at varying temperatures.

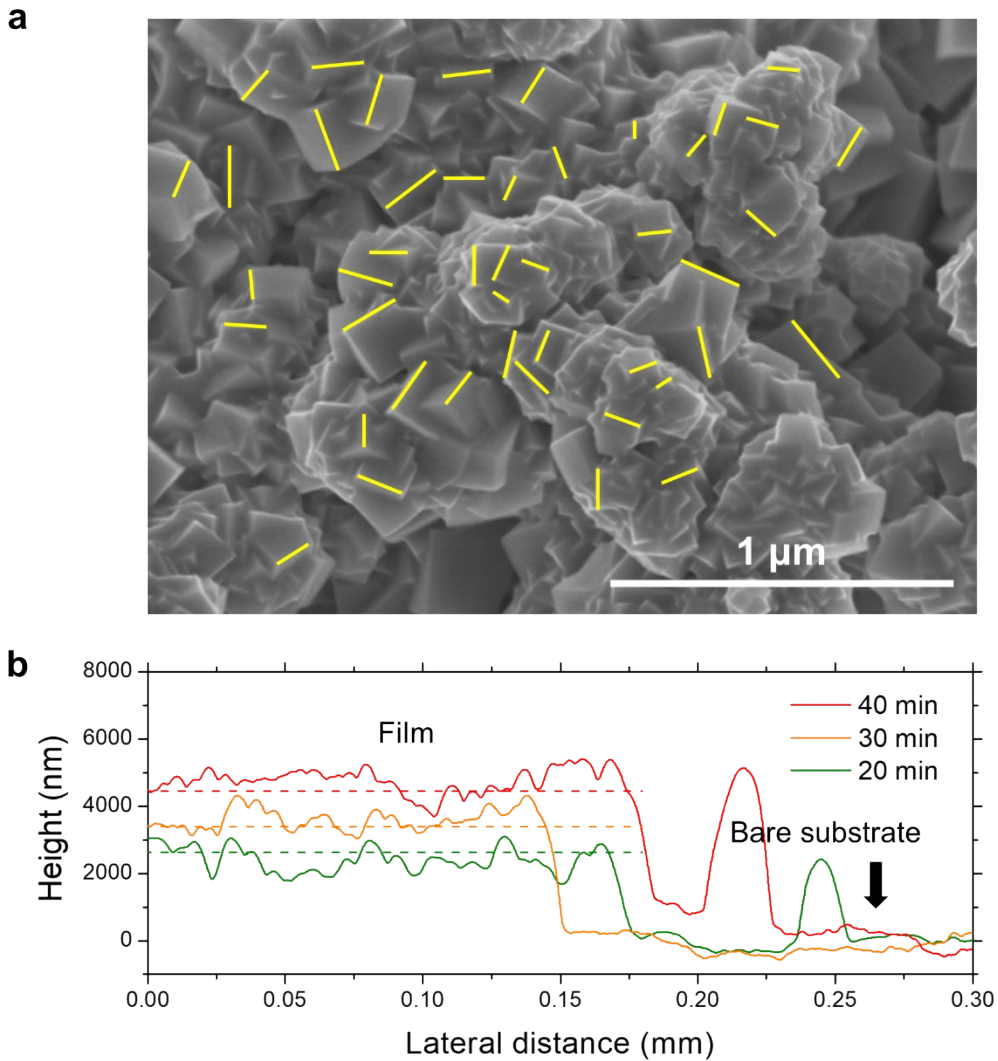

**Figure S4.** (a) Example of particle size measurement from edge-to-edge lengths of cubic particles. (b) Thickness profiles of  $\text{Cu}_2\text{O}$  films deposited at 40 °C for 20, 30, and 40 min measured by a stylus profiler.

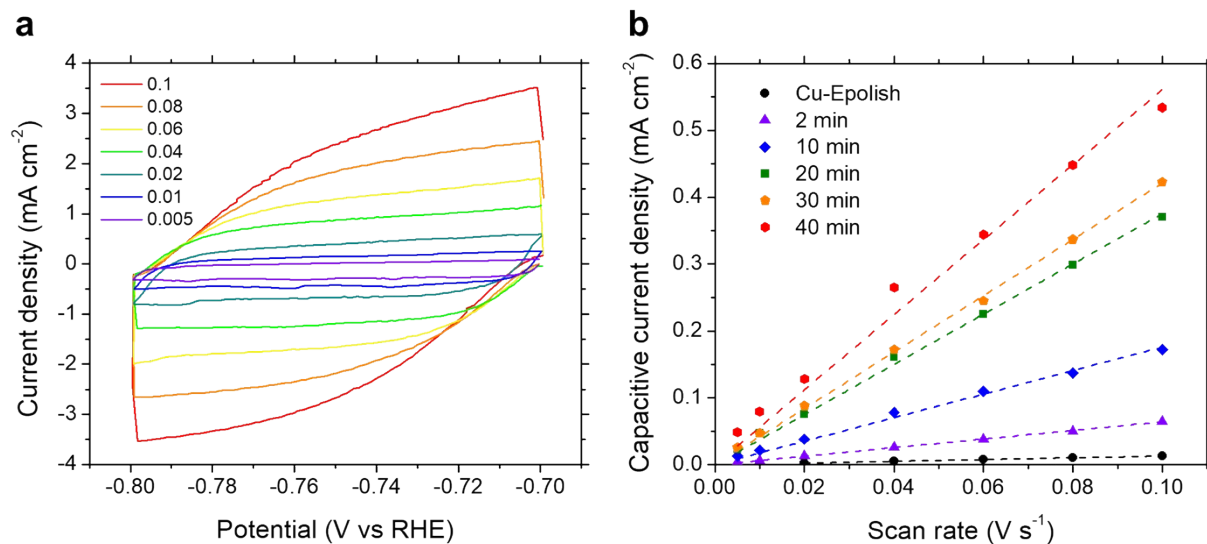

**Figure S5.** (a) Cyclic voltammograms in the non-Faradaic region of the reduced Cu-30 min electrode measured at varying scan rates (in V/s). (b) Capacitive current densities ( $j_{dl} = \frac{j_{anodic} - j_{cathodic}}{2}$ ) of all Cu electrodes measured at -0.75 V vs Ag/AgCl at varying scan rates; the slopes correspond to the double-layer capacitance ( $C_{dl}$ ). The  $C_{dl}$  of Cu-Epolish of 0.14 mF cm<sup>-2</sup> was used as a basis for the roughness factor calculation.

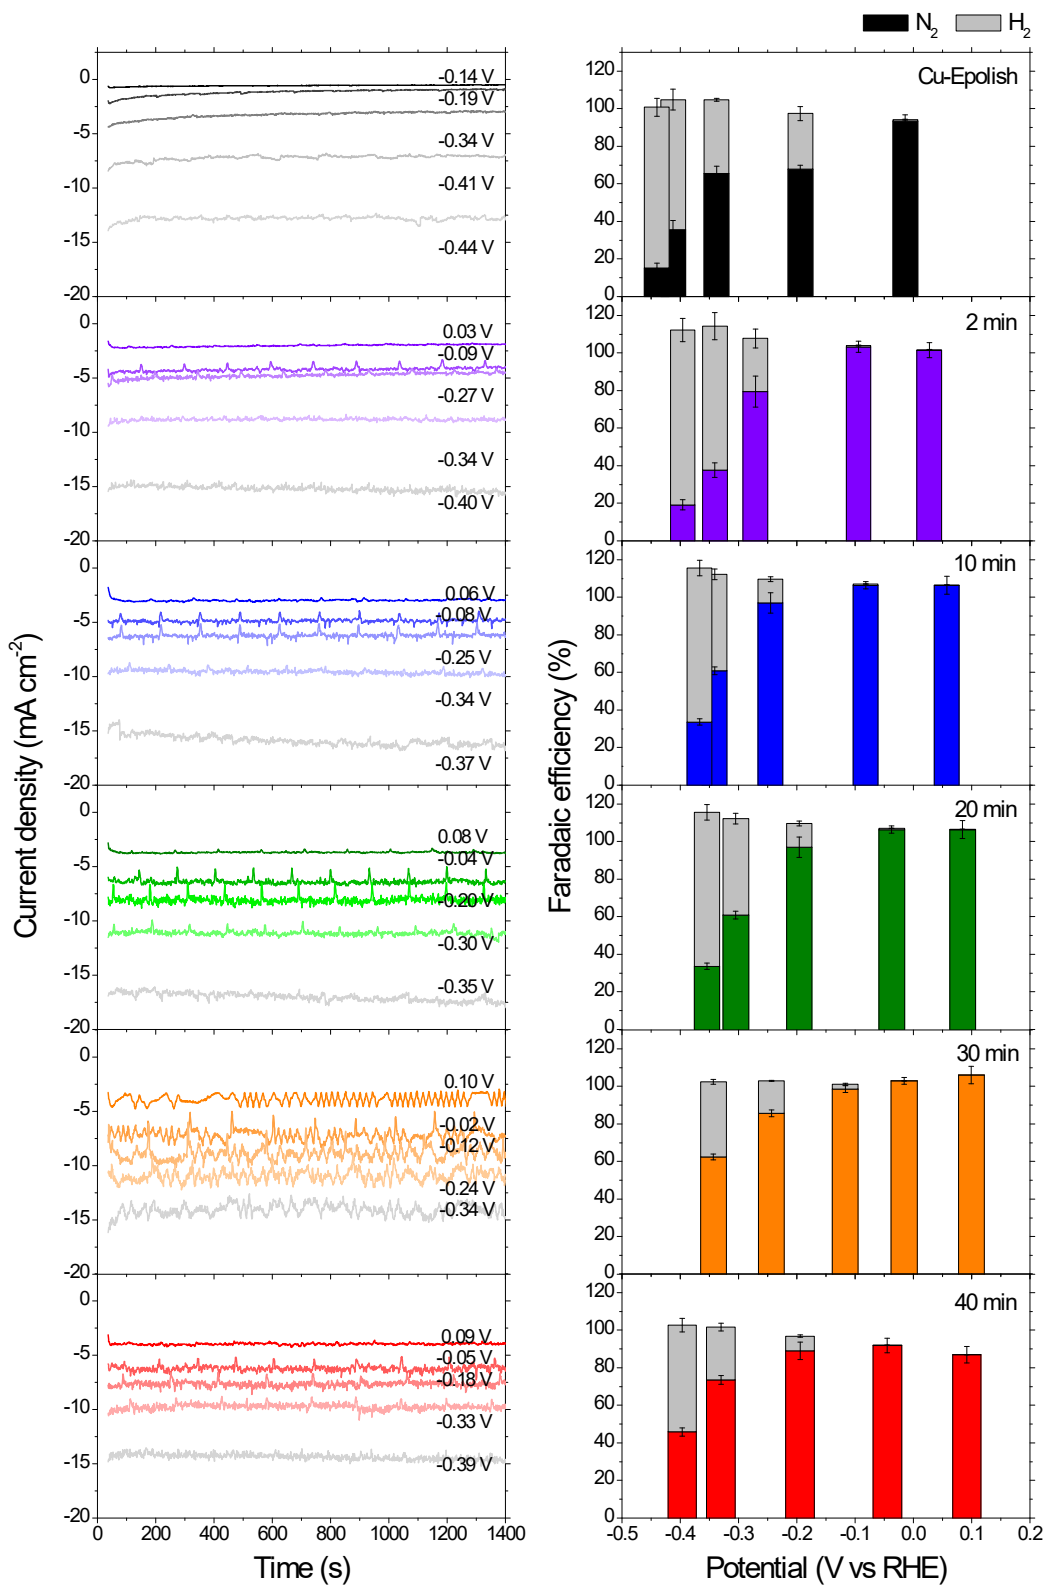

**Figure S6.** Chronoamperometry current densities and Faradaic efficiencies at varying potentials of all catalysts. The electrolysis experiments were conducted in 0.1 M KOH under a 20 mL min<sup>-1</sup> N<sub>2</sub>O gas flow rate.



**Table S2.** Randles circuit components extracted from the Nyquist spectra of Cu-Epolish and Cu-30 min measured at varying potentials

| E<br>(V vs RHE) | Cu-Epolish             |                 |      |                                             | Cu-30 min              |                 |      |                                             |
|-----------------|------------------------|-----------------|------|---------------------------------------------|------------------------|-----------------|------|---------------------------------------------|
|                 | R <sub>ct</sub><br>(Ω) | Q <sub>dl</sub> | α    | C <sub>dl</sub> *<br>(mF cm <sup>-2</sup> ) | R <sub>ct</sub><br>(Ω) | Q <sub>dl</sub> | α    | C <sub>dl</sub> *<br>(mF cm <sup>-2</sup> ) |
| -0.18           | 16.95                  | 4.38E-04        | 0.92 | 0.048                                       | 17.34                  | 2.64E-02        | 0.90 | 4.04                                        |
| -0.29           | 8.18                   | 3.69E-04        | 0.92 | 0.037                                       | 7.85                   | 2.48E-02        | 0.89 | 3.37                                        |
| -0.39           | 5.01                   | 1.02E-03        | 0.87 | 0.075                                       | 4.60                   | 1.35E-02        | 0.86 | 1.43                                        |

The capacitance per unit area can be calculated from constant phase element (Q), constant phase (α), and electrode geometric area (A = 6 cm<sup>2</sup>) as follow:

$$C[\text{mF cm}^{-2}] = \frac{1}{1000 * R * A[\text{cm}^2]} (QR)^{\frac{1}{\alpha}}$$

The average roughness factor of Cu-30 min calculated from EIS ( $C_{dl \text{ Cu-30 min}}/C_{dl \text{ Cu-Epolish}}$ ) is 55.37.

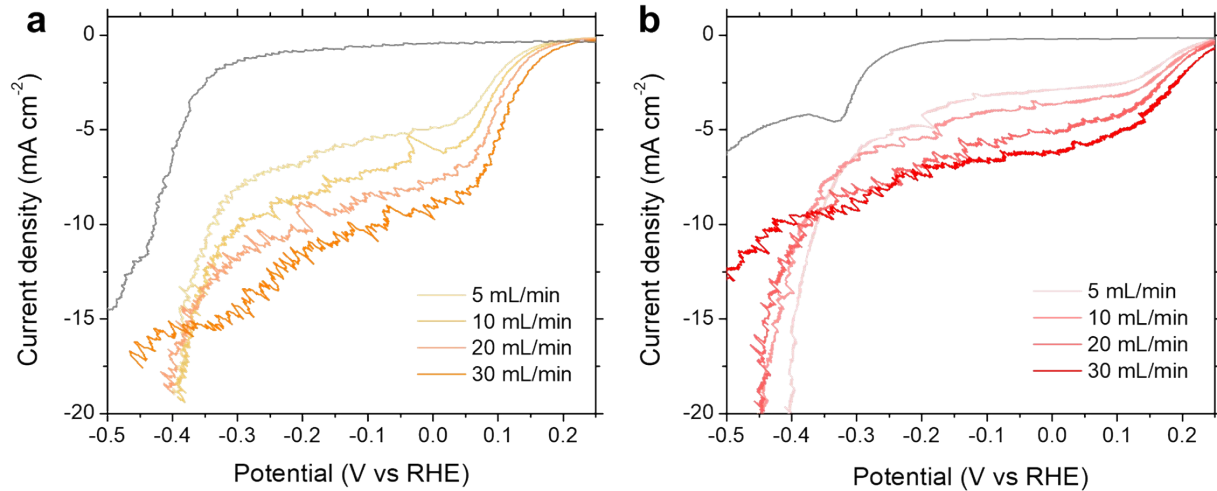

**Figure S7.** Effects of N<sub>2</sub>O flow rate on the current-voltage curves of (a) Cu-30 min and (b) Cu-40 min.

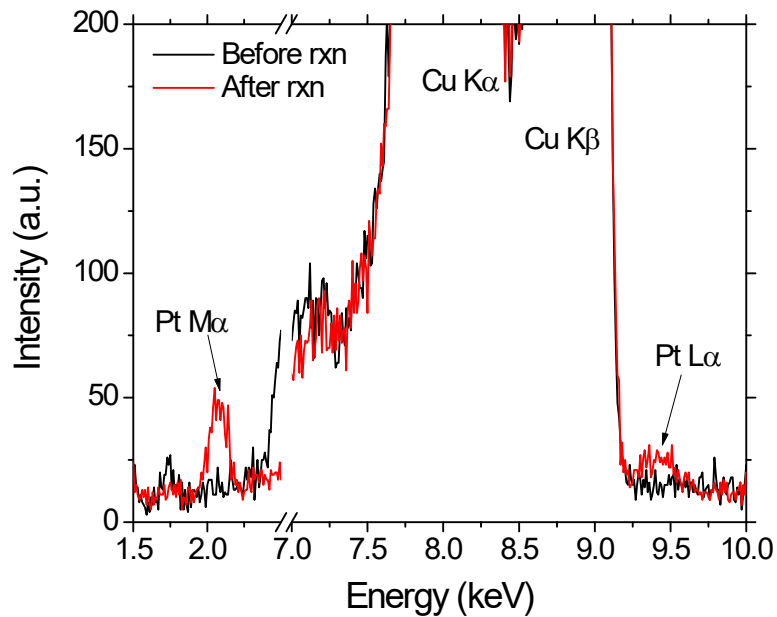

**Figure S8.** XRF spectrum of Cu-30 min catalyst before and after 7 h testing in  $N_2$ ORR condition at 0.12 V vs RHE.

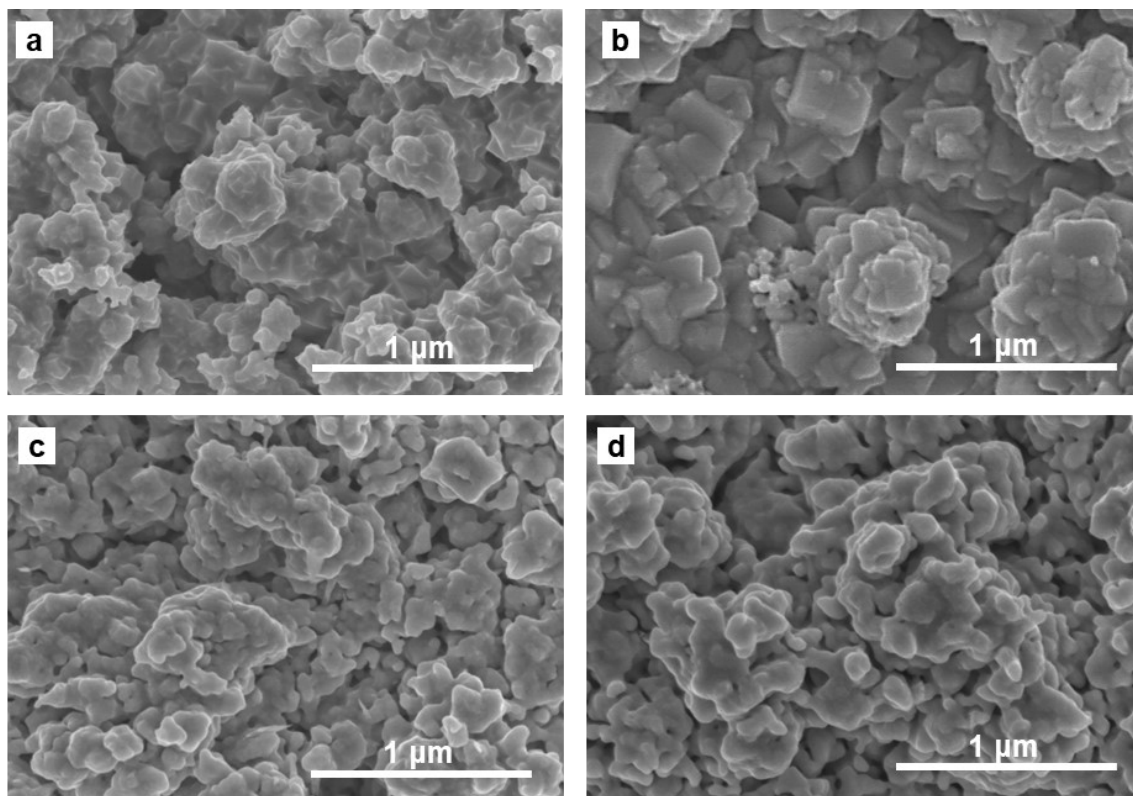

**Figure S9.** SEM images of Cu-30 min sample: (a) as-deposited  $Cu_2O$ , (b) after electrochemical reduction by CV, (c) after a typical  $N_2$ ORR experiment, and (d) after 7 h stability testing.

## References

1. A. Kudo and A. Mine, *Applied Surface Science*, 1997, **121-122**, 538-542.
2. O. J. S. Kwon, S. Baek, H. Kim, I. Choi, O. J. S. Kwon and J. J. Kim, *Electroanalysis*, 2019, **31**, 739-745.
3. K. H. Kim, T. Lim, M. J. Kim, S. Choe, S. Baek and J. J. Kim, *Electrochemistry Communications*, 2016, **62**, 13-16.
4. A. Aziznia, A. Bonakdarpour, E. L. Gyenge and C. W. Oloman, *Electrochimica Acta*, 2011, **56**, 5238-5244.
5. S. Baek, K. Kim, O. S. Kwon, H. Kim, J. W. Han, O. J. Kwon and J. J. Kim, *Journal of Applied Electrochemistry*, 2020, **50**, 395-405.
6. K. Kim, J. Byun, H. Kim, K.-S. Lee, H. S. Lee, J. Kim, T. Hyeon, J. J. Kim and J. W. Han, *ACS Catalysis*, 2021, **11**, 15089-15097.
7. N. Furuya and H. Yoshida, *Journal of Electroanalytical Chemistry*, 1991, **303**, 271-275.
8. R. Gómez and M. J. Weaver, *Langmuir*, 2002, **18**, 4426-4432.
